# Supplementary material for: Using Steered Molecular Dynamics to Predict and Assess Hsp70 Substrate-Binding Domain Mutants that Alter Prion Propagation
Source: PLoS Comput Biol. 2013 Jan 31;9(1):e1002896. doi: 10.1371/journal.pcbi.1002896 (PMC3561046; doi:10.1371/journal.pcbi.1002896)
Supplement: Table S1 — Effects on substrate-binding interaction during the SMD simulation for different Ssa1 and different L483 mutant derivatives. (PDF) [file pcbi.1002896.s006.pdf]

**Table S1** Effects on substrate-binding interaction of different Ssa1p mutations

| Mutation | RMSD (nm) <sup>a</sup> | Interaction energy (kJ mol <sup>-1</sup> ) <sup>b</sup> | Hydrogen bonds <sup>c</sup> | Hydrophobic interactions <sup>c</sup> | Distance of arch structure residues (nm) <sup>d</sup> | Number of hydrogen bonds between inner loops <sup>d</sup> |
|----------|------------------------|---------------------------------------------------------|-----------------------------|---------------------------------------|-------------------------------------------------------|-----------------------------------------------------------|
| WT       | 0.291                  | -324.725                                                | 3.286                       | 61.952                                | 0.778                                                 | 2.873                                                     |
| L483W    | 0.265                  | -472.013                                                | 6.714                       | 73.571                                | 0.582                                                 | 2.444                                                     |
| L483A    | 0.265                  | -404.898                                                | 3.714                       | 56.333                                | 0.832                                                 | 2.779                                                     |
| L483H    | 0.232                  | -518.677                                                | 7.048                       | 87.047                                | 0.664                                                 | 2.944                                                     |

<sup>a</sup>RMSD of C $\alpha$  atoms in the stabilized MD structure.

<sup>b</sup>Interaction energy calculated during the SMD

<sup>c</sup>Numbers of hydrogen bonds and hydrophobic interactions during the course of the SMD.

<sup>d</sup>Distance of arch structure residues and hydrogen bonds in between inner loops in stabilized MD structure.
